# Supplementary material for: Kinetics and thermodynamics of the protein-ligand interactions in the riboflavin kinase activity of the FAD synthetase from Corynebacterium ammoniagenes
Source: PubMed Central journal article supplement (PMC5544777; doi:10.1038/s41598-017-07875-5), 2017-08-04
Supplement: 41598_2017_7875_MOESM1_ESM.pdf [file 41598_2017_7875_MOESM1_ESM.pdf]

**Kinetics and thermodynamics of the protein-ligand interactions in the riboflavin kinase  
activity of the FAD synthetase from *Corynebacterium ammoniagenes***

**María Sebastián<sup>a</sup>, Ana Serrano<sup>a,1</sup>, Adrián Velázquez-Campoy<sup>a,b,c</sup>, and Milagros Medina<sup>a,‡</sup>**

<sup>a</sup> Department of Biochemistry and Molecular and Cellular Biology, Faculty of Sciences, and Institute of Biocomputation and Physics of Complex Systems (Joint Units: BIFI-IQFR and GBsC-CSIC), University of Zaragoza, Spain

<sup>b</sup> ARAID Foundation, Diputación General de Aragón, Spain

<sup>c</sup> Aragon Institute for Health Research (IIS Aragon), Zaragoza, 50009, Spain

<sup>‡</sup>Correspondence to: Milagros Medina, Departamento de Bioquímica y Biología Molecular y Celular. Facultad de Ciencias, Universidad de Zaragoza. Pedro Cerbuna, 12. 50009 Zaragoza, Spain. Tel: +34976762476; Fax: +34976762123. E-mail: [mmedina@unizar.es](mailto:mmedina@unizar.es)

<sup>1</sup>Present address: Centro de Investigaciones Biológicas, CSIC, Ramiro de Maeztu 9, E-28040 Madrid, Spain

**RUNNING TITLE: The riboflavin kinase mechanism of FAD synthetase from *Corynebacterium ammoniagenes***

SUPPLEMENTAL FIGURES

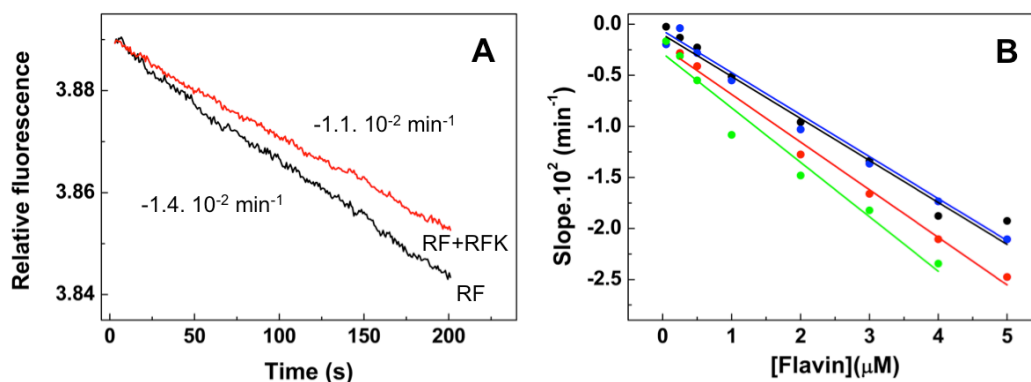

**Figure SP1. Presteady-state kinetic analysis of flavins photodecay and of their binding to the RFK module of *CaFADS*.** (A) Kinetic traces of the evolution of the RF fluorescence ( $1 \mu\text{M}$ ) in the stopped-flow equipment follow zero order decays both in the absence (black line) and presence (red line) of the RFK module ( $0.2 \mu\text{M}$ ). (B) Slopes of linear fluorescence decays on the flavin concentration for samples containing RF (black), FMN (blue), as well as RF (red) and FMN (green) in the presence of the RFK module. All mixtures show linear dependences on flavin concentrations with similar negative slopes. They, therefore, indicate that increasing flavin concentrations protect from photobleaching during measurements. Experiments were performed in  $20 \text{ mM PIPES}$ ,  $0.8 \text{ mM MgCl}_2$ ,  $\text{pH } 7.0$  at  $25 \text{ }^\circ\text{C}$ .

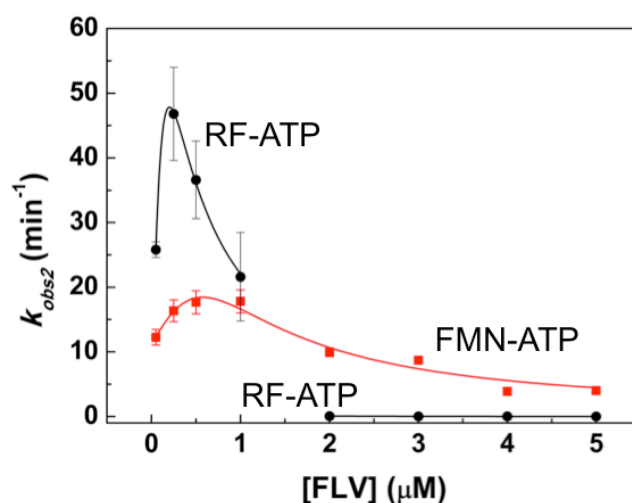

**Figure SP2.** (A) Evolution of  $k_{obs2}$  as a function of the FMN concentration for reaction mixtures of the RFK module with FMN+ATP (red) and with RF+ATP (black) follow a biphasic behavior with maximum  $\sim 0.5 \mu\text{M}$  FMN and  $\sim 0.25 \mu\text{M}$  RF. All the experiments were carried out in the stopped-flow equipment at  $25^\circ\text{C}$  in  $20 \text{ mM PIPES}$  and,  $0.8 \text{ mM MgCl}_2$ ,  $\text{pH } 7.0$  with  $0.2 \mu\text{M}$  of the RFK module. All concentrations that are indicated are final concentrations in the mixing cell. Other conditions as in Figure 3.

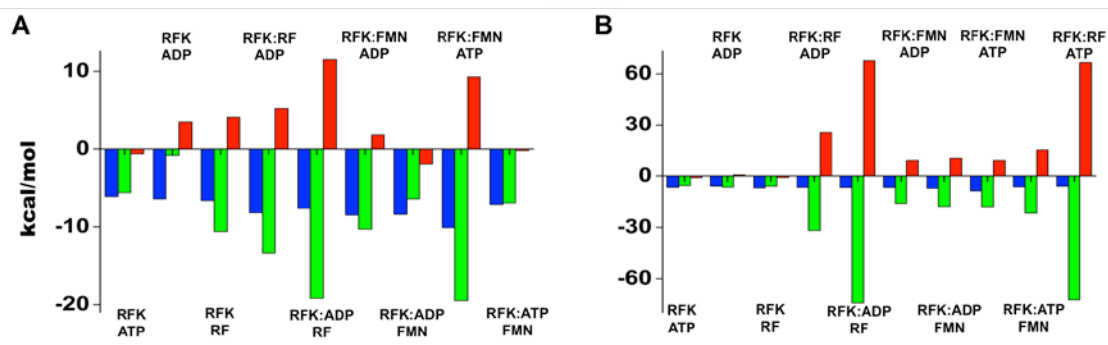

**Figure SP3.** Thermodynamic dissection of the interaction of different ligands with either the free RFK module, or with the preformed mixtures of the RFK module with different ligands (RFK:X). Parameters obtained (A) in the presence of 0.8 mM MgCl<sub>2</sub> and (B) in the absence of MgCl<sub>2</sub>. Experiments were carried out in 20 mM PIPES, pH 7.0, at 25°C. The binding Gibbs energy ( $\Delta G$ ), enthalpy ( $\Delta H$ ), and entropy ( $-T\Delta S$ ) contributions to the binding are represented in blue, green and red bars, respectively.

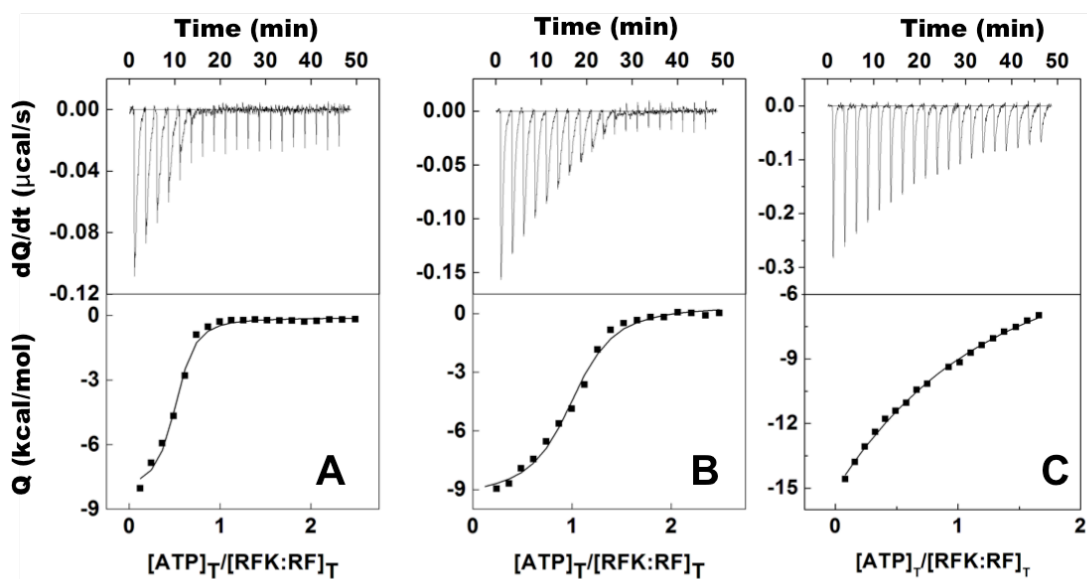

**Figure SP4.** Calorimetric titrations with ATP of mixtures containing different ratios of the RFK module and the RF ligand (RFK:X). Experiments were performed at (A) 7.5, (B) 15, and (C) 180  $\mu\text{M}$  of RF with 25  $\mu\text{M}$  RFK module in 20 mM PIPES, pH 7.0 at 25 °C. Data were fit to a home-derived model for a single binding site. Within each panel, upper charts show thermograms for the different interactions and the lower panels the corresponding binding isotherms with integrated heats.

**SUPPLEMENTAL TABLE**

**Table SP1.** Thermodynamic interaction parameters for the combination of the RFK module with different ligands as obtained through ITC. Column named initial mixture indicates the starting composition of the calorimetric cell. Titrations were carried out at 25°C in 20 mM PIPES, 0.8 mM MgCl<sub>2</sub>, pH 7.0 (upper table) and in 20 mM PIPES, pH 7.0 (lower table). Errors in  $\Delta G$ ,  $\Delta H$  and  $-T\Delta S$  were estimated in  $\pm 0.3$  kcal/mol, taken in general larger than the standard deviation between three replicates and the numerical error after fitting analysis.

| 0.8 mM MgCl <sub>2</sub> |        |                     |                          |                          |                            |
|--------------------------|--------|---------------------|--------------------------|--------------------------|----------------------------|
| initial mixture          | ligand | $K_d$<br>( $\mu$ M) | $\Delta G$<br>(kcal/mol) | $\Delta H$<br>(kcal/mol) | $-T\Delta S$<br>(kcal/mol) |
| RFK                      | ATP    | 28.7                | -6.1                     | -5.6                     | -0.6                       |
| RFK                      | ADP    | 22.1                | -6.4                     | -9.8                     | 3.5                        |
| RFK                      | RF     | 15.2                | -6.6                     | -10.6                    | 4.1                        |
| RFK                      | FMN    | n.d. <sup>a</sup>   | n.d. <sup>a</sup>        | n.d. <sup>a</sup>        | n.d. <sup>a</sup>          |
| RFK:RF                   | ADP    | 1.0                 | -8.2                     | -13.4                    | 5.2                        |
| RFK:RF                   | ATP    | n.m. <sup>b</sup>   | n.m. <sup>b</sup>        | n.m. <sup>b</sup>        | n.m. <sup>b</sup>          |
| RFK:FMN                  | ADP    | 0.6                 | -8.5                     | -10.3                    | 1.8                        |
| RFK:FMN                  | ATP    | 0.04                | -10.1                    | -19.5                    | 9.3                        |
| RFK:ATP                  | FMN    | 6.6                 | -7.1                     | -6.9                     | -0.2                       |
| RFK:ATP                  | RF     | n.m. <sup>b</sup>   | n.m. <sup>b</sup>        | n.m. <sup>b</sup>        | n.m. <sup>b</sup>          |
| RFK:ADP                  | FMN    | 0.8                 | -8.4                     | -6.4                     | -1.9                       |
| RFK:ADP                  | RF     | 2.3                 | -7.6                     | -19.2                    | 11.5                       |
| 0.0 mM MgCl <sub>2</sub> |        |                     |                          |                          |                            |
| initial mixture          | ligand | $K_d$<br>( $\mu$ M) | $\Delta G$<br>(kcal/mol) | $\Delta H$<br>(kcal/mol) | $-T\Delta S$<br>(kcal/mol) |
| RFK                      | ATP    | 16.3                | -6.5                     | -5.5                     | -1.0                       |
| RFK                      | ADP    | 51.4                | -5.8                     | -6.4                     | 0.6                        |
| RFK                      | RF     | 19.5                | -6.9                     | -5.9                     | -0.9                       |
| RFK                      | FMN    | n.d. <sup>a</sup>   | n.d. <sup>a</sup>        | n.d. <sup>a</sup>        | n.d. <sup>a</sup>          |
| RFK:RF                   | ADP    | 17.1                | -6.5                     | -31.8                    | 25.4                       |
| RFK:RF                   | ATP    | 50.4                | -5.9                     | -72.5                    | 66.6                       |
| RFK:FMN                  | ADP    | 14.8                | -6.6                     | -15.9                    | 9.3                        |
| RFK:FMN                  | ATP    | 0.5                 | -8.6                     | -17.9                    | 9.3                        |
| RFK:ATP                  | FMN    | 23.9                | -6.3                     | -21.7                    | 15.4                       |
| RFK:ATP                  | RF     | n.d. <sup>a</sup>   | n.d. <sup>a</sup>        | n.d. <sup>a</sup>        | n.d. <sup>a</sup>          |
| RFK:ADP                  | FMN    | 6.4                 | -7.1                     | -17.7                    | 10.6                       |
| RFK:ADP                  | RF     | 14.5                | -6.6                     | -74.3                    | 67.7                       |

<sup>a</sup> n.d. Not detected. Not heat of interaction was detected for this titration. <sup>b</sup> n.m. Not measured. This combination of ligands in the presence of Mg<sup>2+</sup> leads to the catalytic reaction, preventing determination of binding heats.
